# Supplementary material for: An effective method for detecting nitrous oxide using alkaline washing and GC-MS
Source: Royal Society of Chemistry journal article supplement (doi:10.1039/d4ay01961j), 2024-12-17
Supplement: d4ay01961j1.pdf [file d4ay01961j1.pdf]

## Supplementary Information

### **An effective method for detecting nitrous oxide using alkaline washing and GC-MS**

Mu Yang<sup>a,b</sup>, Wenqing Gao<sup>b,c\*</sup>, Liang Ma<sup>a,b</sup>, Xingyu Chen<sup>a,b</sup>, Haixing Wang<sup>d\*</sup>,  
Jiancheng Yu<sup>a,b,c\*</sup> and Keqi Tang<sup>b,c</sup>

<sup>a</sup>Faculty of Electrical Engineering and Computer Science, Ningbo University, Ningbo, China.

<sup>b</sup>Zhejiang Engineering Research Center of Advanced Mass Spectrometry and Clinical Application, Institute of Mass Spectrometry, Ningbo University, Ningbo, China.

<sup>c</sup>Ningbo Zhenhai Institute of Mass Spectrometry, Ningbo, China.

<sup>d</sup>Key Laboratory of Drug Prevention and Control Technology of Zhejiang Province, National Narcotics Laboratory Zhejiang Regional Center, Hangzhou, China.

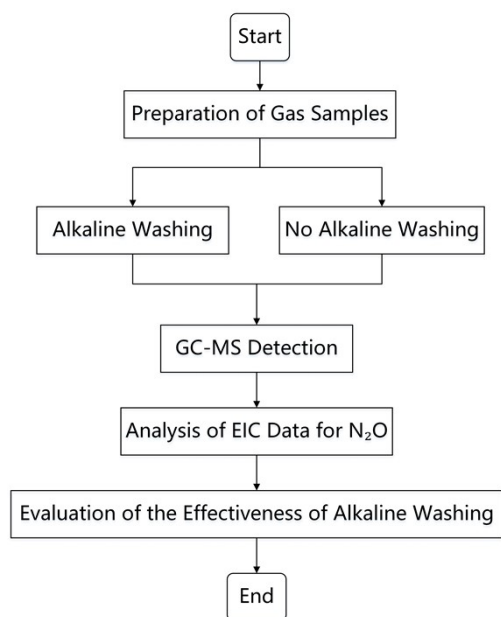

Fig. S1 Overall process flowchart.

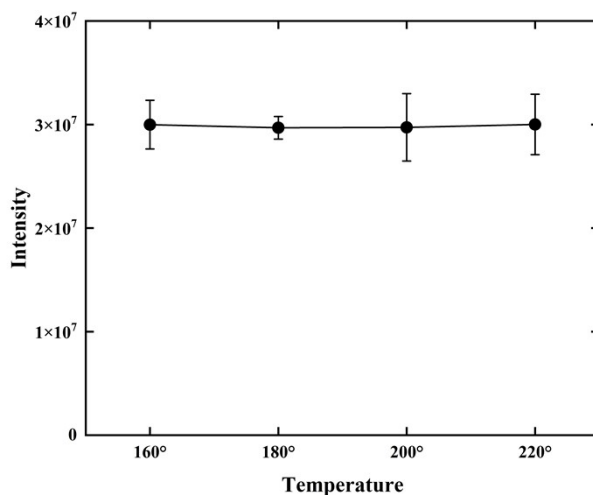

Fig. S2 Injection port temperature optimization.

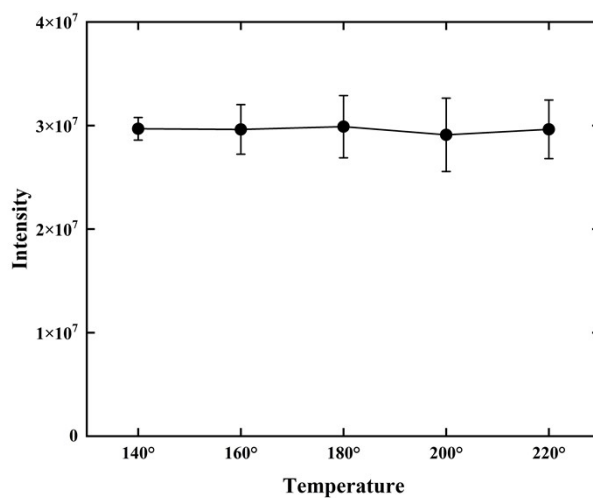

Fig. S3 Column final temperature optimization.

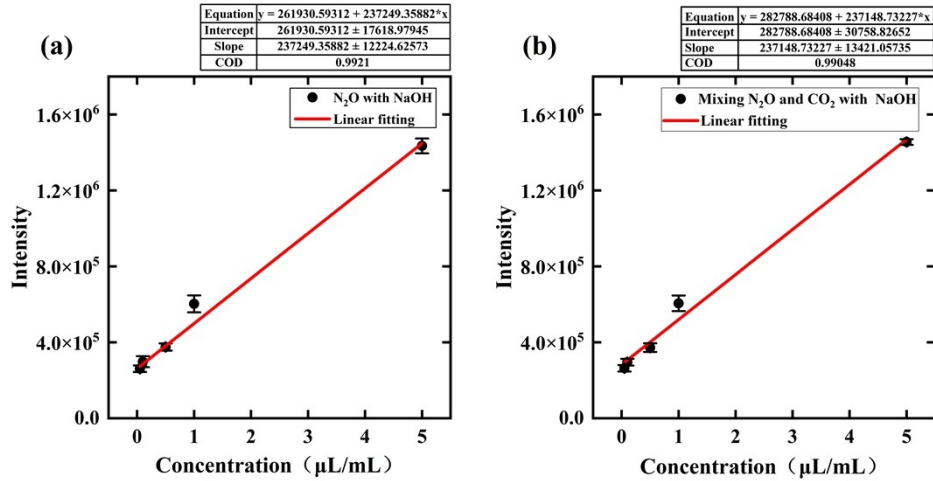

Fig. S4 Linear plot of EIC peak area after low concentration gas alkali washing. (a) Alkali washing with single  $N_2O$  gas. (b) Alkali washing with mixed gases of  $N_2O$  and  $CO_2$ .

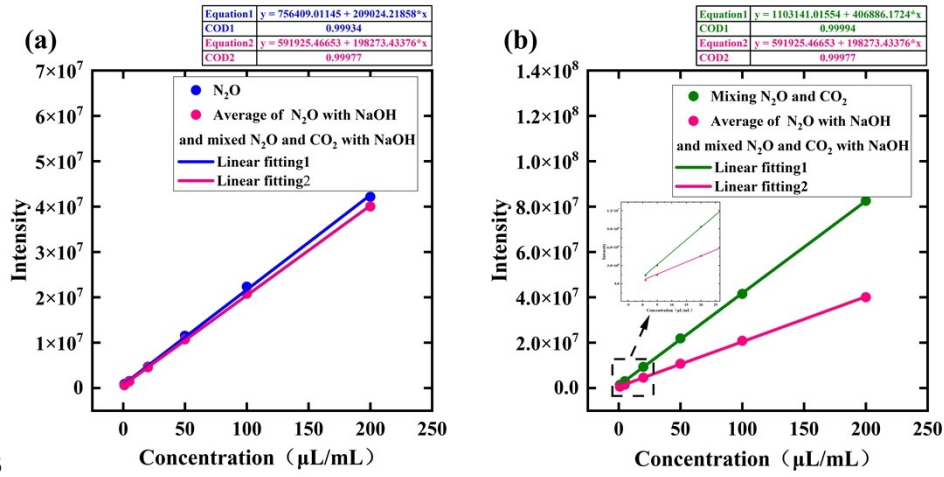

Fig. S5 Linear comparison of EIC peak area between direct detection and detection of  $N_2O$  after alkaline washing. (a) Single  $N_2O$  gas in non alkaline washing state. (b) mixed gases of  $N_2O$ - $CO_2$  in non alkaline washing state.

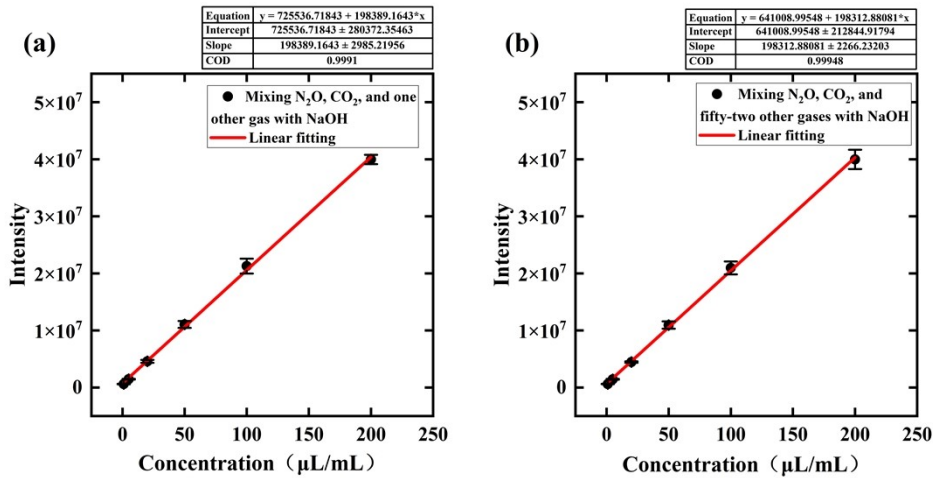

Fig. S6 Linear plot of EIC peak area under impurity gas interference. (a) under one impurity gas condition. (b) Under 52 impurity gas conditions.
